# Supplementary material for: Cleistocalyx nervosum var. paniala Berry Seed Protects against TNF-α-Stimulated Neuroinflammation by Inducing HO-1 and Suppressing NF-κB Mechanism in BV-2 Microglial Cells
Source: MDPI journal article supplement (doi:10.3390/molecules28073057), 2023-03-29

# Original Images for Blots/Gels

**Supplementary Figure S1.** Original photographs of the full-length blots at three independent experiments of each protein marker of Figure 8A.

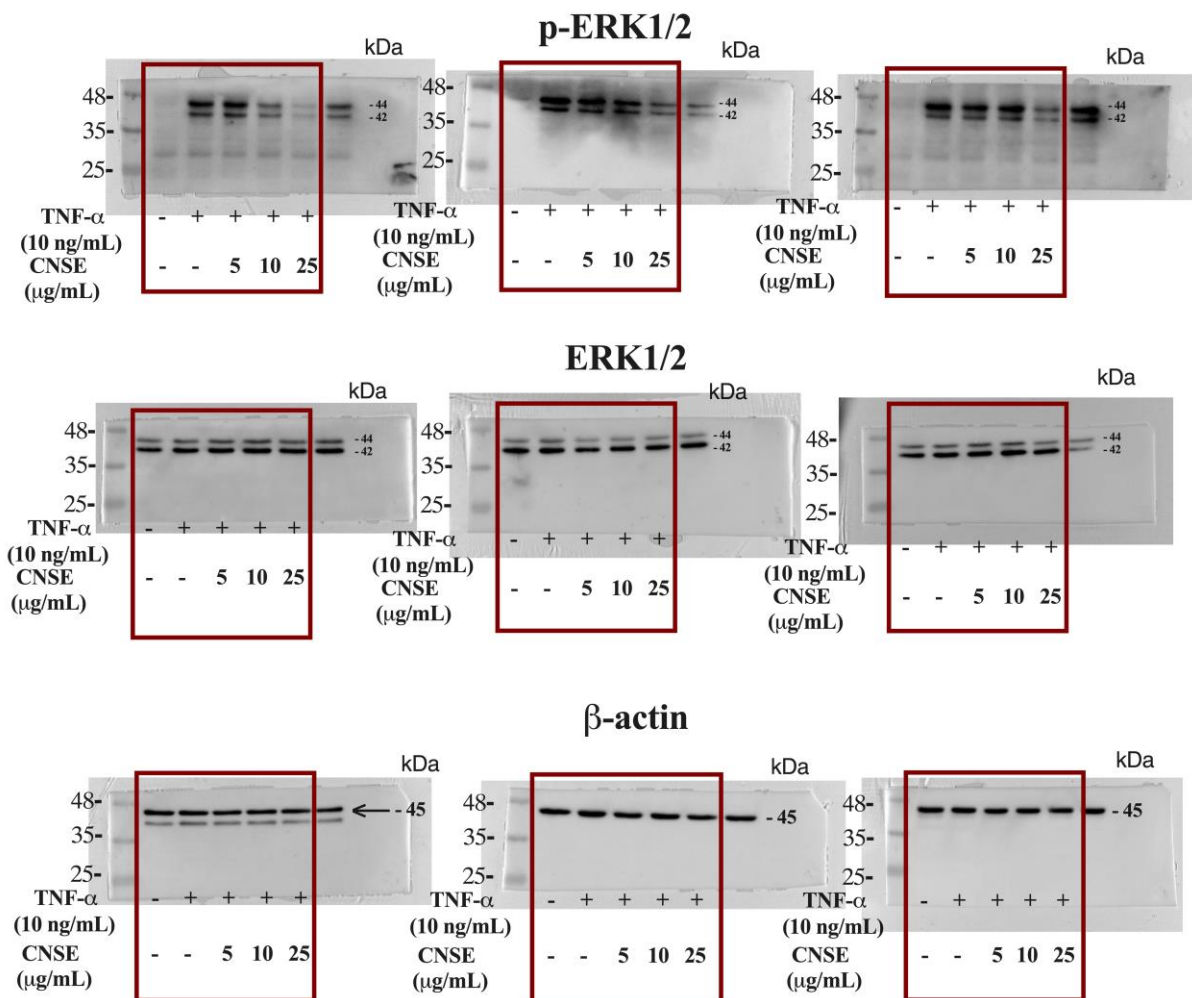

### p-p38MAPK

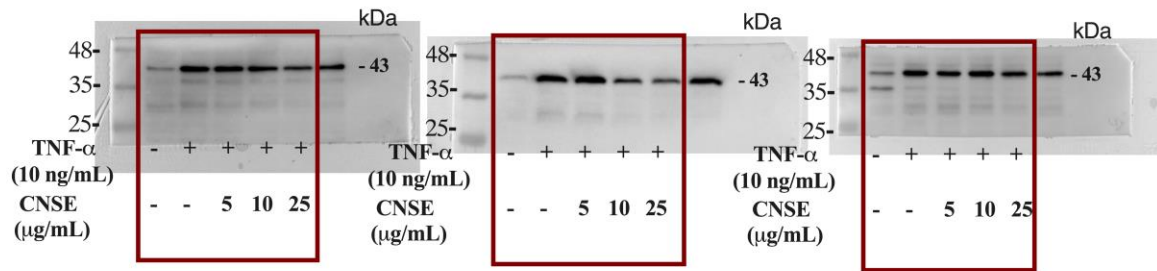

### p38MAPK

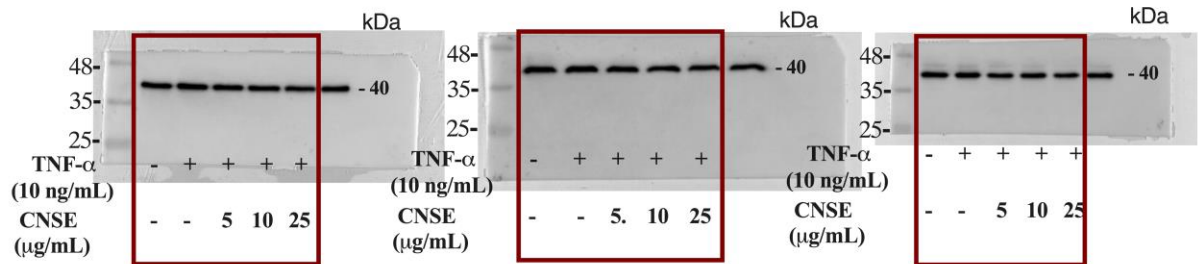

### β-actin

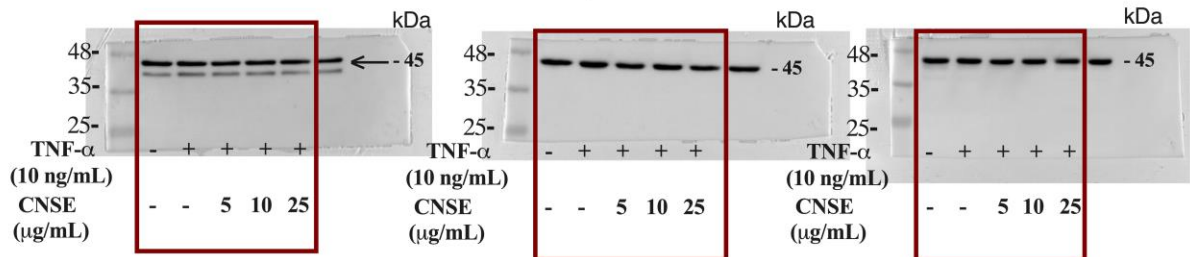

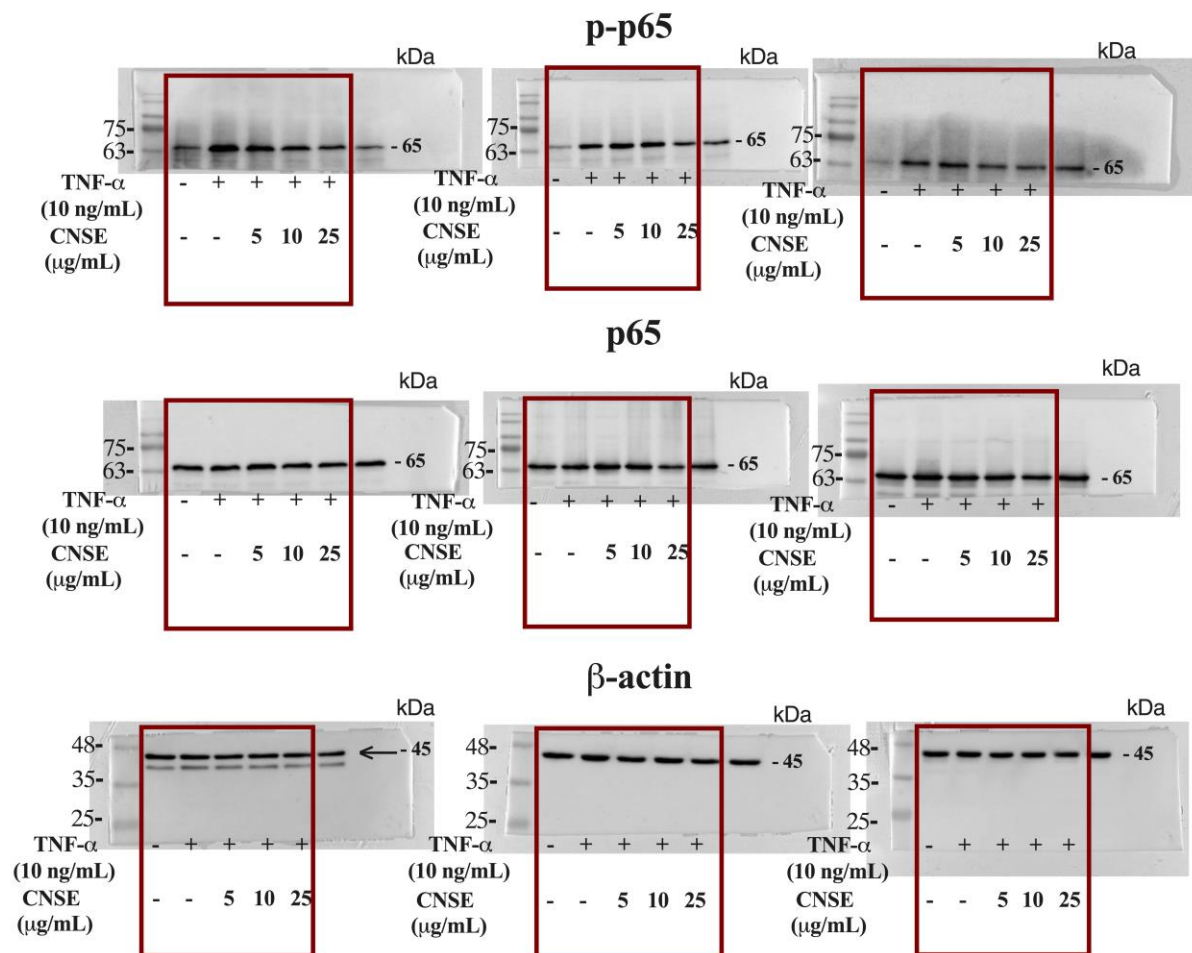

### p-I $\kappa$ B- $\alpha$

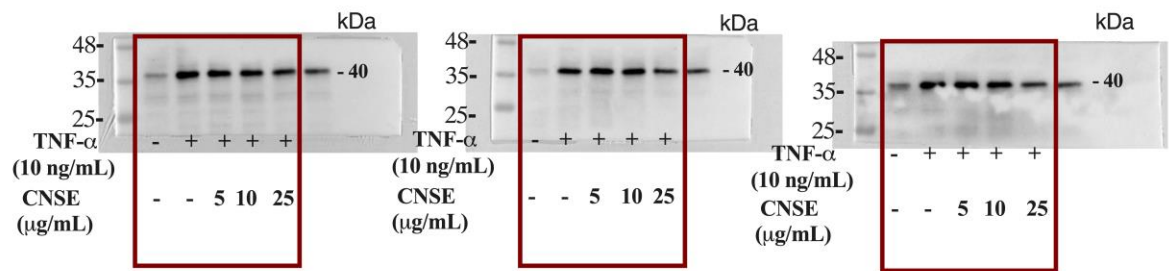

### I $\kappa$ B- $\alpha$

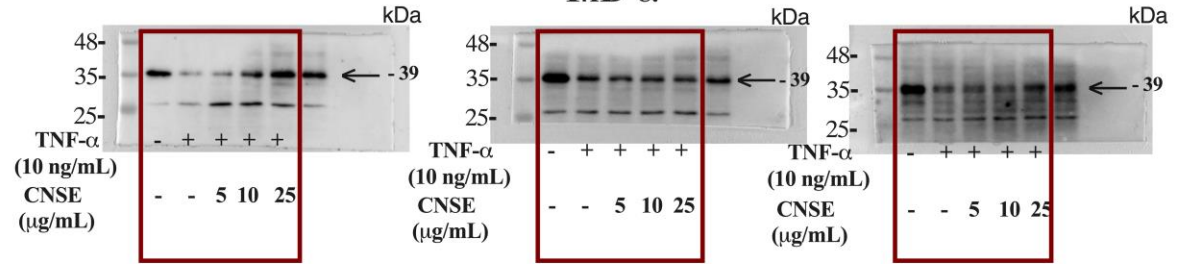

### $\beta$ -actin

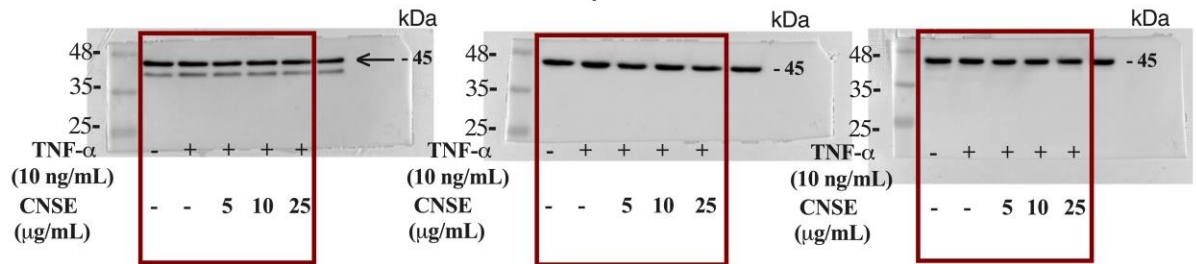

**Supplementary Figure S2.** Original photographs of the full-length blots at three independent experiments of HO-1 protein of Figure 9A.

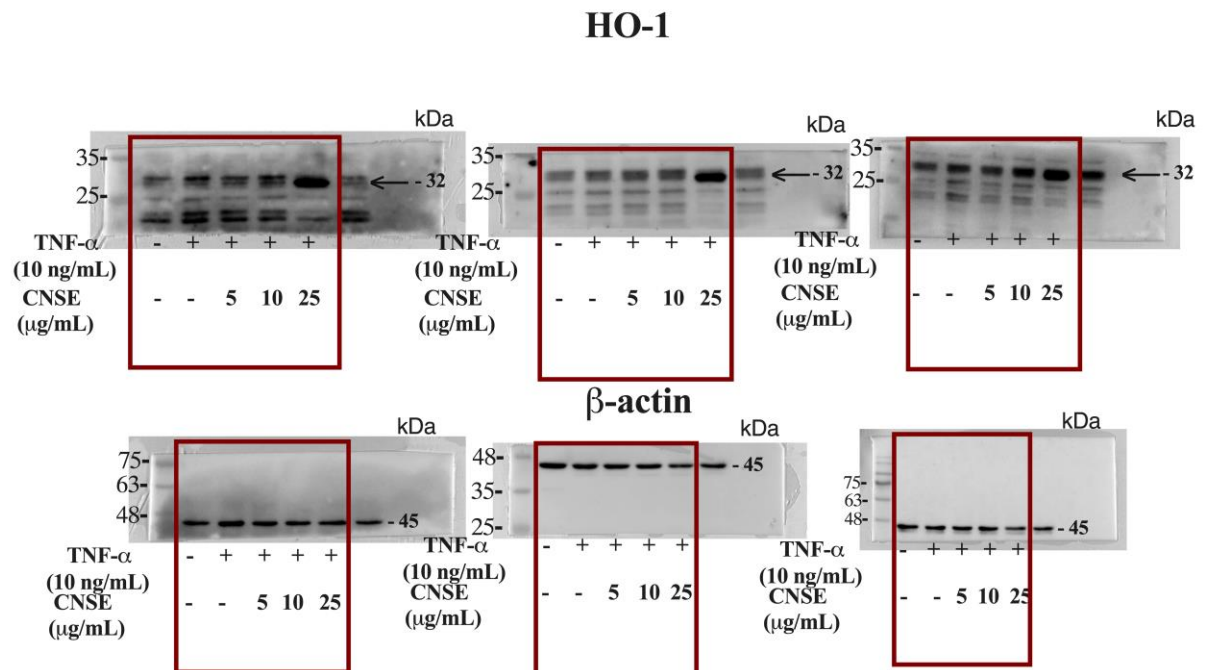

Supplement: s1 [file s1]
